# Supplementary material for: Application of CRISPR/Cas9 Tools for Genome Editing in the White-Rot Fungus Dichomitus squalens
Source: MDPI journal article supplement (doi:10.3390/biom11101526), 2021-10-15
Supplement: s1 [file s1]

**Supplementary Materials** to the manuscript “Application of CRISPR/Cas9 tools for genome editing in the white-rot fungus *Dichomitus squalens*” by Kowalczyk et al.

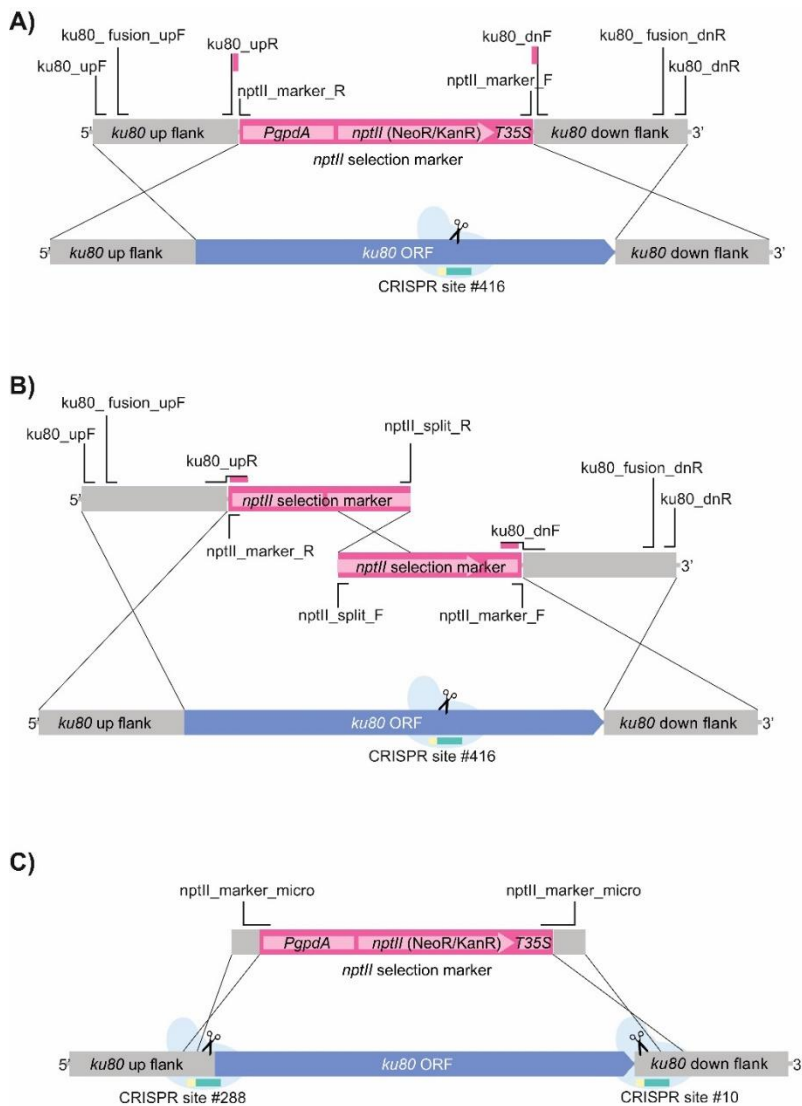

**Figure S1.** Construction of HDR-based donor DNA for repair of DNA breaks introduced by gRNA/Cas9 RNPs at *ku80* locus of *Dichomitus squalens*. (a) The linear *ku80* deletion cassette harboring geneticin resistance gene (*nptII*) and ~1.6 kb flanks homologous to *ku80* up- and down-stream regions. (b) The split marker deletion cassette requires an additional recombination step between the overlapping parts of the marker. (c) The microhomology repair template with geneticin resistance gene (*nptII*) flanked by ~40 bp homologous *ku80* tails.

(a)

|                       |                                                               |     |
|-----------------------|---------------------------------------------------------------|-----|
|                       | START                                                         |     |
| ura3 WT               | ATGTCGTCGTGTATCCAAGCAGACTTACGCGCAAAGGGCTGCCAGCACCCAAACCCCTGCT | 60  |
| ura3 <sup>MUT_A</sup> | ATGTCGTCGTGTATCCAAGCAGACTTACGCGCAAAGGGCTGCCAGCACCCAAACCCCTGCT | 60  |
|                       | *****                                                         |     |
|                       | PAM CRISPR site #137                                          |     |
| ura3 WT               | GCAAAGGCGCTCCTCGAGACGATCGAACGCAAACGCACCAA                     | 120 |
| ura3 <sup>MUT_A</sup> | GCAAAGGCGCTCCTCGAGACGATCGAACGCAAACGCACCAA                     | 120 |
|                       | *****                                                         |     |
|                       | STOP                                                          |     |
| ura3 WT               | GTGACCAAAACAAGAGGATTCTTCAGGATTATCGACACCGTCGGACCGTACGTATGTCTG  | 180 |
| ura3 <sup>MUT_A</sup> | GTGACCAAAACAAGAGGATTCTTCAGGATTATCGACACCGTCGGACCGTACGTATGTCTG  | 180 |
|                       | *****                                                         |     |
|                       | STOP                                                          |     |
| ura3 WT               | TTGAAGGTAGGTGATCGAGTTTTTCGGAATATTACGAAAGGCTAACCGATGCCATGAAA   | 240 |
| ura3 <sup>MUT_A</sup> | TTGAAGGTAGGTGATCGAGTTTTTCGGAATATTACGAAAGGCTAACCGATGCCATGAAA   | 240 |
|                       | *****                                                         |     |
|                       | STOP                                                          |     |
| ura3 WT               | GACACACGTAGATATCATTGAGGACTTCGAGCCGTCCTGATCGAGCGCCTCAAGGAACT   | 300 |
| ura3 <sup>MUT_A</sup> | GACACACGTAGATATCATTGAGGACTTCGAGCCGTCCTGATCGAGCGCCTCAAGGAACT   | 300 |
|                       | *****                                                         |     |
|                       | STOP                                                          |     |
| ura3 WT               | TAGCCAAAAGCATGACTTCCTGATCTTCGAGGACAGGAAGTTCGCAGACATCGGTGAGGT  | 360 |
| ura3 <sup>MUT_A</sup> | TAGCCAAAAGCATGACTTCCTGATCTTCGAGGACAGGAAGTTCGCAGACATCGGTGAGGT  | 360 |
|                       | *****                                                         |     |
|                       | STOP                                                          |     |
| ura3 WT               | CCTTCCACATAATATCTCTGCTATACTGAGAAAAGGTAGGAAATACCGTGGCCCTACAG   | 420 |
| ura3 <sup>MUT_A</sup> | CCTTCCACATAATATCTCTGCTATACTGAGAAAAGGTAGGAAATACCGTGGCCCTACAG   | 420 |
|                       | *****                                                         |     |
|                       | STOP                                                          |     |
| ura3 WT               | TACTCCGCAGGCGTTTACAAGATCGCGAGTTGGTCGCATATAACCAACGCTCATCCAGTC  | 480 |
| ura3 <sup>MUT_A</sup> | TACTCCGCAGGCGTTTACAAGATCGCGAGTTGGTCGCATATAACCAACGCTCATCCAGTC  | 480 |
|                       | *****                                                         |     |
|                       | PAM CRISPR site #119                                          |     |
| ura3 WT               | CCCGGACCGTCCATCATCTCTGGCCTCAAA                                | 540 |
| ura3 <sup>MUT_A</sup> | CCCGGACCGTCCATCATCTCTGGCCTCAAA                                | 503 |
|                       | *****                                                         |     |
|                       | n. 504-565del                                                 |     |
|                       | STOP                                                          |     |
| ura3 WT               | CTGCTGCTCGCTGAGATGAGCACAAAAGGAAGCCTGGCTACCGGAGTGTACACGGAGGAG  | 600 |
| ura3 <sup>MUT_A</sup> | CTGCTGCTCGCTGAGATGAGCACAAAAGGAAGCCTGGCTACCGGAGTGTACACGGAGGAG  | 538 |
|                       | *****                                                         |     |
|                       | STOP                                                          |     |
| ura3 WT               | GCGGTTTCAATGGCTCGGGCCAATCGCGACTTCGTGATCGGCTTCATCGCCAGCGACGG   | 660 |
| ura3 <sup>MUT_A</sup> | GCGGTTTCAATGGCTCGGGCCAATCGCGACTTCGTGATCGGCTTCATCGCCAGCGACGG   | 598 |
|                       | *****                                                         |     |
|                       | STOP                                                          |     |
| ura3 WT               | ATGGACGCGCTCGGCTTACGGGAAGGCGAGTCCACGCCAGACGAGGACTTACTCATTCTT  | 720 |
| ura3 <sup>MUT_A</sup> | ATGGACGCGCTCGGCTTACGGGAAGGCGAGTCCACGCCAGACGAGGACTTACTCATTCTT  | 658 |
|                       | *****                                                         |     |
|                       | STOP                                                          |     |
| ura3 WT               | ACTCCGGGCGTGGGGCTGGACACAAGGGGAGACGGCATGGGCCAGCAATATCGGACGCCC  | 780 |
| ura3 <sup>MUT_A</sup> | ACTCCGGGCGTGGGGCTGGACACAAGGGGAGACGGCATGGGCCAGCAATATCGGACGCCC  | 718 |
|                       | *****                                                         |     |
|                       | STOP                                                          |     |
| ura3 WT               | AGGGAGGTAATCGTAGAGTCCGGCTGCGACGTCATCATCGTTGGTCGAGGGATTACGGG   | 840 |
| ura3 <sup>MUT_A</sup> | AGGGAGGTAATCGTAGAGTCCGGCTGCGACGTCATCATCGTTGGTCGAGGGATTACGGG   | 778 |
|                       | *****                                                         |     |
|                       | STOP                                                          |     |
| ura3 WT               | AAAGACAATGGTGCCAATGTGAGGCTGTCCGAGCACAAAGCGGAGAGGTATCGTGCAGAG  | 900 |
| ura3 <sup>MUT_A</sup> | AAAGACAATGGTGCCAATGTGAGGCTGTCCGAGCACAAAGCGGAGAGGTATCGTGCAGAG  | 838 |
|                       | *****                                                         |     |
|                       | STOP                                                          |     |
| ura3 WT               | GGATGGAAGCATATCGGGAGAGGGTCGATATCTCAGAC                        | 942 |
| ura3 <sup>MUT_A</sup> | GGATGGAAGCATATCGGGAGAGGGTCGATATCTCAGAC                        | 880 |
|                       | *****                                                         |     |

(b)

|                       |                                                               |     |
|-----------------------|---------------------------------------------------------------|-----|
|                       | START                                                         |     |
| ura3 WT               | ATGTCGTCGTGTATCCAAGCAGACTTACGCGCAAAGGGCTGCCAGCACCCAAACCCCTGCT | 60  |
| ura3 <sup>MUT_B</sup> | ATGTCGTCGTGTATCCAAGCAGACTTACGCGCAAAGGGCTGCCAGCACCCAAACCCCTGCT | 60  |
|                       | *****                                                         |     |
|                       | PAM CRISPR site #137                                          |     |
| ura3 WT               | GCAAAGGCGCTCCTCGAGACGATCGAACGCAAACGCACCAA                     | 120 |
| ura3 <sup>MUT_B</sup> | GCAAAGGCGCTCCTCGAGACGATCGAACGCAAACGCACCAA                     | 102 |
|                       | *****                                                         |     |
|                       | n. 103-517del                                                 |     |
|                       | STOP                                                          |     |
| ura3 WT               | GTGACCAAAACAAGAGGATTCTTCAGGATTATCGACACCGTCGGACCGTACGTATGTCTG  | 180 |
| ura3 <sup>MUT_B</sup> | GTGACCAAAACAAGAGGATTCTTCAGGATTATCGACACCGTCGGACCGTACGTATGTCTG  |     |
|                       | *****                                                         |     |
|                       | STOP                                                          |     |
| ura3 WT               | TTGAAGGTAGGTGATCGAGTTTTTCGGAATATTACGAAAGGCTAACCGATGCCATGAAA   | 240 |
| ura3 <sup>MUT_B</sup> | TTGAAGGTAGGTGATCGAGTTTTTCGGAATATTACGAAAGGCTAACCGATGCCATGAAA   |     |
|                       | *****                                                         |     |
|                       | STOP                                                          |     |
| ura3 WT               | GACACACGTAGATATCATTGAGGACTTCGAGCCGTCCTGATCGAGCGCCTCAAGGAACT   | 300 |
| ura3 <sup>MUT_B</sup> | GACACACGTAGATATCATTGAGGACTTCGAGCCGTCCTGATCGAGCGCCTCAAGGAACT   |     |
|                       | *****                                                         |     |

|                              |                                                               |     |
|------------------------------|---------------------------------------------------------------|-----|
| <i>ura3</i> WT               | TAGCCAAAAGCATGACTTCCTGATCTTCGAGGACAGGAAGTTCGCAGACATCGGTGAGGT  | 360 |
| <i>ura3</i> <sup>MUT_B</sup> | -----                                                         |     |
| <i>ura3</i> WT               | CCTTCCACATAATATCTCTGCTATACTGAGAAAAGGTAGGAAATACCGTGGCCCTACAG   | 420 |
| <i>ura3</i> <sup>MUT_B</sup> | -----                                                         |     |
| <i>ura3</i> WT               | TACTCCGCAGGCGTTTACAAGATCGCGAGTTGGTCGCATATAACCAACGCTCATCCAGTC  | 480 |
| <i>ura3</i> <sup>MUT_B</sup> | -----                                                         |     |
| <i>ura3</i> WT               | CCCGGACCGTCCATCATCTCTGGCCTCAAAT                               | 540 |
| <i>ura3</i> <sup>MUT_B</sup> | -----GACTTCCACTCGGGAGAGGGCTC                                  | 125 |
|                              | *****                                                         |     |
| <i>ura3</i> WT               | CTGCTGCTCGCTGAGATGAGCACAAAAGGAAGCCTGGCTACCGGAGTGTTACACGGAGGAG | 600 |
| <i>ura3</i> <sup>MUT_B</sup> | CTGCTGCTCGCTGAGATGAGCACAAAAGGAAGCCTGGCTACCGGAGTGTTACACGGAGGAG | 185 |
|                              | *****                                                         |     |
| <i>ura3</i> WT               | GCGGTTTCAATGGCTCGGGCCAATCGCGACTTCGTGATCGGCTTCATCGCCAGCGACGG   | 660 |
| <i>ura3</i> <sup>MUT_B</sup> | GCGGTTTCAATGGCTCGGGCCAATCGCGACTTCGTGATCGGCTTCATCGCCAGCGACGG   | 245 |
|                              | *****                                                         |     |
| <i>ura3</i> WT               | ATGGACGGCGTCGGCTTACGGGAAGGCGAGTCCACGCCAGACGAGGACTTACTCATTCTT  | 720 |
| <i>ura3</i> <sup>MUT_B</sup> | ATGGACGGCGTCGGCTTACGGGAAGGCGAGTCCACGCCAGACGAGGACTTACTCATTCTT  | 305 |
|                              | *****                                                         |     |
| <i>ura3</i> WT               | ACTCCGGGCGTGCGGCTGGACACAAGGGGAGACGGCATGGGCCAGCAATATCGGACGCCC  | 780 |
| <i>ura3</i> <sup>MUT_B</sup> | ACTCCGGGCGTGCGGCTGGACACAAGGGGAGACGGCATGGGCCAGCAATATCGGACGCCC  | 365 |
|                              | *****                                                         |     |
| <i>ura3</i> WT               | AGGGAGGTAATCGTAGAGTCCGGCTGCGACGTCATCATCGTTGGTCGAGGGATTACGGG   | 840 |
| <i>ura3</i> <sup>MUT_B</sup> | AGGGAGGTAATCGTAGAGTCCGGCTGCGACGTCATCATCGTTGGTCGAGGGATTACGGG   | 425 |
|                              | *****                                                         |     |
| <i>ura3</i> WT               | AAAGACAATGGTGCCAATGTGCGAGGCTGTCCGAGCACAAGCGGAGAGGTATCGTGCAGAG | 900 |
| <i>ura3</i> <sup>MUT_B</sup> | AAAGACAATGGTGCCAATGTGCGAGGCTGTCCGAGCACAAGCGGAGAGGTATCGTGCAGAG | 485 |
|                              | *****                                                         |     |
| <i>ura3</i> WT               | GGATGGAAAGCATATCGGGAGAGGGTCGATATCTCAGACTGA                    | 942 |
| <i>ura3</i> <sup>MUT_B</sup> | GGATGGAAAGCATATCGGGAGAGGGTCGATATCTCAGACTGA                    | 527 |
|                              | *****                                                         |     |

(c)

|                              |                                                              |     |
|------------------------------|--------------------------------------------------------------|-----|
| 915108                       | CAGGAGCGGAGGAGGAGACCAAGTGACCCTCGTGACGCGAGCGTGAGGTTGAGACGAA   | 60  |
| <i>ura3</i> <sup>MUT_B</sup> | CAGGAGCGGAGGAGGAGACCAAGTGACCCTCGTGACGCGAGCGTGAGGTTGAGACGAA   | 60  |
|                              | *****                                                        |     |
| 915108                       | TCCGCTTTGAATCTACAGAGCCCGTGGTTGAGACATTCTGTATGCGGCGCATGCCTGCTG | 120 |
| <i>ura3</i> <sup>MUT_B</sup> | TCCGCTTTGAATCTACAGAGCCCGTGGTTGAGACATTCTGTATGCGGCGCATGCCTGCTG | 120 |
|                              | *****                                                        |     |
| 915108                       | CGCGGACCCGATCGCCCTGCGAAGAGTGAAGTCAGCATGAGGCAATGCGTATGATAGACC | 180 |
| <i>ura3</i> <sup>MUT_B</sup> | CGCGGACCCGATCGCCCTGCGAAGAGTGAAGTCAGCATGAGGCAATGCGTATGATAGACC | 180 |
|                              | *****                                                        |     |
| 915108                       | GAATGGGCGTGCCTCCTGAATAATATTATACAGATGCCACATGTCTTCATCATCCTCGGG | 240 |
| <i>ura3</i> <sup>MUT_B</sup> | GAATGGGCGTGCCTCCTGAATAATATTATACAGATGCCACATGTCTTCATCATCCTCGGG | 240 |
|                              | *****                                                        |     |
| 915108                       | GCGGACAGTGACACGACCCCTGAGTGTAGACATGCGTTAGTTGAGCGACCCCGC       | 294 |
| <i>ura3</i> <sup>MUT_B</sup> | GCGGACAGTGACACGACCCCTGAGTGTAGACATGCGTTAGTTGAGCGACCCCGC       | 294 |
|                              | *****                                                        |     |

protein ID: 915108

**Figure S2.** Sanger sequencing of *D. squalens ura3*<sup>MUT\_A</sup> and *ura3*<sup>MUT\_B</sup> strains. (a) The *D. squalens ura3*<sup>MUT\_A</sup> has a 61 bp deletion, n.103-517del, near CRISPR site #119 in comparison to *ura3* gene the wild type *D. squalens* strain (WT). (b) The *D. squalens ura3*<sup>MUT\_B</sup> has a 414 bp long deletion, n.103-517del, between CRISPR sites #137 and #119, (c) and a 294 bp long insertion that was identified to be a fragment of a putative meiotic cell division protein with protein ID: 915108.

**Table S1.** Sequences of CRISPR/Cas9 guides.

| Target      | CRISPR/Cas9 site ID | Sequence (5' → 3')   | PAM | Location                        | Activity Score (Doench et al. [38]) | Specificity Score (Hsu et al. [39]) | #Off-target Sites |
|-------------|---------------------|----------------------|-----|---------------------------------|-------------------------------------|-------------------------------------|-------------------|
| <i>ura3</i> | CRISPR guide #137   | GACATCCACACTAACGGAG  | AGG | 1 <sup>st</sup> exon            | 0.756                               | 100.00%                             | 0 (0 in CDS)      |
|             | CRISPR guide #130   | CTTTTGGCTAAGTTCCTTG  | AGG | 2 <sup>nd</sup> exon            | 0.672                               | 100.00%                             | 0 (0 in CDS)      |
|             | CRISPR guide #119   | CTCCCGAGTGGAAAGTCCGA | CGG | 3 <sup>rd</sup> exon            | 0.656                               | 100.00%                             | 0 (0 in CDS)      |
| <i>sdi1</i> | CRISPR guide #40    | ATTGAAGATCGTGTGGCAA  | CGG | exon                            | 0.464                               | 99.91%                              | 1 (0 in CDS)      |
|             | CRISPR guide #71    | ATTCTGCATCTTCTCCTTA  | CGG | exon                            | 0.446                               | 100.00%                             | 0 (0 in CDS)      |
|             | CRISPR guide #29    | AAAGCTCCACAACGAGCGT  | GGG | intron                          | 0.402                               | 99.62%                              | 1 (0 in CDS)      |
| <i>ku80</i> | CRISPR guide #376   | CTCGCCGCCGGACGATGCT  | GGG | 1 <sup>st</sup> exon            | 0.208                               | 100.00%                             | 0 (0 in CDS)      |
|             | CRISPR guide #382   | TGATCAACGACGCTAACGG  | TGG | 2 <sup>nd</sup> exon            | 0.496                               | 100.00%                             | 0 (0 in CDS)      |
|             | CRISPR guide #386   | AGACCCAAGACCAATACCT  | CGG | 3 <sup>rd</sup> exon            | 0.761                               | 100.00%                             | 0 (0 in CDS)      |
|             | CRISPR guide #416   | CAAATACATGGACCCCCCG  | CGG | 8 <sup>th</sup> exon            | 0.899                               | 100.00%                             | 0 (0 in CDS)      |
|             | CRISPR guide #288   | TGCTACTACCCCTTCGACA  | CGG | <i>ku80</i> 5' flank            | 0.024                               | 100.00%                             | 0 (0 in CDS)      |
|             | CRISPR guide #10    | CAGAATTGATCAAGGACGG  | AGG | <i>ku80</i> 3' flank            | 0.116                               | 88.59%                              | 14 (10 in CDS)    |
| <i>lcc3</i> | CRISPR guide #270   | GAAGACCACTAGTATCGTA  | CGG | 2 <sup>nd</sup> exon/<br>intron | 0.581                               | 100.00%                             | 0 (0 in CDS)      |
| <i>mnp2</i> | CRISPR guide #241   | AGTTCGTGCCCCGTGAGTCG | CGG | 1 <sup>st</sup> exon/<br>intron | 0.675                               | 100.00%                             | 0 (0 in CDS)      |

**Table S2.** PCR primers used for guide RNA synthesis.

| Primer name          | Sequence (5' → 3')                     |
|----------------------|----------------------------------------|
| ura3 guide #137 F    | TAATACGACTCACTATAGGACATCCACACTAACGGAG  |
| ura3 guide #137 R    | TTCTAGCTCTAAAACCTCCGTTAGTGTGGATGTC     |
| ura3 guide #130 F    | TAATACGACTCACTATAGCTTTTGGCTAAGTTCCTTG  |
| ura3 guide #130 R    | TTCTAGCTCTAAAACCAAGGAAGTTAGCCAAAAG     |
| ura3 guide #119 F    | TAATACGACTCACTATAGCTCCCGAGTGGAAGTCCGA  |
| ura3 guide #119 R    | TTCTAGCTCTAAAACCTCGGACTTCCACTCGGGAG    |
| sdi1 guide #40 F     | TAATACGACTCACTATAGATTGAAGATCGTGTGG     |
| sdi1 guide #40 R     | TTCTAGCTCTAAAACCTTGCCACACGATCTTCAAT    |
| sdi1 guide #71 F     | TAATACGACTCACTATAGATTCTGCATCTTCTCC     |
| sdi1 guide #71 R     | TTCTAGCTCTAAAACCTAAGGAGAAGATGCAGAAT    |
| sdi1 guide #29 F     | TAATACGACTCACTATAGAAAGCTCCACAACGAG     |
| sdi1 guide #29 R     | TTCTAGCTCTAAAACACGCTCGTTGTGGAGCTTT     |
| ku80 guide #376 F    | TAATACGACTCACTATAGCTCGCCGCCGGACGATGCT  |
| ku80 guide #376 R    | TTCTAGCTCTAAAACAGCATCGTCCGGCGGCGAG     |
| ku80 guide #382 F    | TAATACGACTCACTATAGTGATCAACGACGCTAACGG  |
| ku80 guide #382 R    | TTCTAGCTCTAAAACCCGTTAGCGTCGTTGATCA     |
| ku80 guide #386 F    | TAATACGACTCACTATAGAGACCCAAGACCAATACCT  |
| ku80 guide #386 R    | TTCTAGCTCTAAAACAGGTATTGGTCTTGGGTCT     |
| ku80 guide #416 F    | TAATACGACTCACTATAGCAAATACATGGACCCCCCG  |
| ku80 guide #416 R    | TTCTAGCTCTAAAACCGGGGGGTCCATGTATTTG     |
| ku80 guide #288 F    | TAATACGACTCACTATAGTGCTACTACCCCTTCGACA  |
| ku80 guide #288 R    | TTCTAGCTCTAAAACCTGTCGAAGGGGTAGTAGCA    |
| ku80 guide #10 F     | TAATACGACTCACTATAGCAGAATTGATCAAGGACGG  |
| ku80 guide #10 R     | TTCTAGCTCTAAAACCCGTCCTTGATCAATTCTG     |
| Ds_lcc3 guide #270 F | TAATACGACTCACTATAGGAAGACCACTAGTATCGTA  |
| Ds_lcc3 guide #270 R | TTCTAGCTCTAAAACCTACGATACTAGTGGTCTTC    |
| Ds_mnp2 guide #241 F | TAATACGACTCACTATAGAGTTCGTGCCCCGTGAGTCG |
| Ds_mnp2 guide #241 R | TTCTAGCTCTAAAACCGACTCACGGGCACGAACT     |

**Table S3.** Primers used to construct homology-based repair templates for *ku80* deletion. The assembly schema is visualized in Figure S1.

| Primer name                                     | Description                                                                                | Sequence 5'-3'                                                        | Amplicon size (bp) |
|-------------------------------------------------|--------------------------------------------------------------------------------------------|-----------------------------------------------------------------------|--------------------|
| A) For linear and split marker repair templates |                                                                                            |                                                                       |                    |
| nptII_marker_F                                  | Amplifies outside T35S terminator in pFungiway8                                            | GATGGGCTGCCTGTATCGAG                                                  | 1993               |
| nptII_marker_R                                  | Amplifies outside <i>PgpdA</i> in pFungiway8                                               | GCCGCTCTAGACTCTTGGC                                                   |                    |
| ku80_upF                                        | Amplifies <i>ku80</i> upstream flank                                                       | CGCTCAGCAACGTCTCAATC                                                  | 1638               |
| ku80_upR                                        | Amplifies <i>ku80</i> upstream flank with complementary <i>nptII</i> marker overhang       | TCGTCCAGTACCAGCCAAGAGTCT<br>AGAGCGTGACTTAGCATACGAAC<br>AGCATCG        |                    |
| ku80_dnF                                        | Amplifies <i>ku80</i> downstream flank with complementary <i>nptII</i> marker overhang     | AAAATCACCACCTCGATACAGGCA<br>GCCCATCGACATTCGGCATCTAAC<br>TCTGC         | 1667               |
| ku80_dnR                                        | Amplifies <i>ku80</i> downstream flank                                                     | CGTCAACTGCTGTGATCTGC                                                  |                    |
| ku80_fusion_upF                                 | Nested primer for <i>ku80</i> flank and <i>nptII</i> marker fusion                         | CCTCTAGTCTCGATGGACAGC                                                 | 5147               |
| ku80_fusion_dnR                                 | Nested primer for <i>ku80</i> flank and <i>nptII</i> marker fusion                         | GCAGGTGAGTCCTTCATCCC                                                  |                    |
| nptII_split_F                                   | Amplifies split marker template with ku80_fusion_dnR                                       | GGTGCCCTGAATGAACTCCA                                                  | 2648               |
| nptII_split_R                                   | Amplifies split marker template with ku80_fusion_upF                                       | AAAAGCGGCCATTTTCCACC                                                  | 2947               |
| B) For microhomology repair template            |                                                                                            |                                                                       |                    |
| nptII_marker_micro                              | Amplifies <i>nptII</i> marker with 38 nt tail homologous to <i>ku80</i> up-flanking region | GGCACCGCGACAAGCCGCGCCTC<br>CTCACGTTGCTACTACGCTCTAGA<br>CTCTTGGCTGGTA  | 1993               |
| nptII_marker_micro R                            | Amplifies <i>nptII</i> marker with 40 nt tail homologous to <i>ku80</i> dn-flanking region | GACGATGGTCTGCGCGTTTCGCGG<br>AATGCGCAGCAGAATTGGATGGG<br>CTGCCTGTATCGAG |                    |

**Table S4.** Sequences of ssODNs.

| Oligo name           | Sequence                                                                                                                          |
|----------------------|-----------------------------------------------------------------------------------------------------------------------------------|
| ssODN #1 sdi1 120 bp | GACACCTACAAGGCGCATCGTAAGGAGAAGATGCAGAATGAGCTCAGTCTCTAT<br>CGTTGCCTCACGATCTTCAACTGCGCGCGCACGTGCCCCAAGGGCCTGAACCCCG<br>CCGCTGCCATC  |
| ssODN #2 sdi1 100 bp | CAAGGCGCATCGTAAGGAGAAGATGCAGAATGAGCTCAGTCTCTATCGTTGCCTC<br>ACGATCTTCAACTGCGCGCGCACGTGCCCCAAGGGCCTGAACCCC                          |
| ssODN #3 sdi1 80 bp  | CGCATCGTAAGGAGAAGATGCAGAATGAGCTCAGTCTCTATCGTTGCCTCACGAT<br>CTTCAACTGCGCGCGCACGTGCCCC                                              |
| ssODN #4 sdi1 60 bp  | GTAAGGAGAAGATGCAGAATGAGCTCAGTCTCTATCGTTGCCTCACGATCTTCAA<br>CTGCG                                                                  |
| ssODN #5 sdi1 40 bp  | GTCTCTATCGTTGCCTCACGATCTTCAACTGCGCGCGCAC                                                                                          |
| ssODN #6 sdi1 120 bp | CGTCTCACGCTCGTTGTGGATCCTTGGCAGGCCTAATGCGACACGCGCATACAGG<br>ACACCTACAAGGCGCATCGTAAGGAGAAGATGCAGAATGAGCTCAGTCTCTATC<br>GTTGCCTCACG  |
| ssODN #7 ku80 stop   | ATGTTCTCGTCGACATCTAGCCTTCCATGGGCAAGATGCGAGAATTCGAGGTCTC<br>AGCATAGTCCGGCGGCGAGTCCGAGGTCATCGAGATGACCAACCTCGAGTGGTCA<br>CTGCAGTTC   |
| ssODN #8 ku80 stop   | GACCGACAAGTGTGGCGTCATTCTCTTCGGTAGCGAAGAGACGAACAACATGATC<br>AACGACGCTAACGGATCCTACGAACATGTCGCGGAGTAAATCCCCATCGCCCAGC<br>CCAACCTCGGC |
| ssODN #9 ku80 stop   | AGACTGACTTCTGCCCCGAGCCATCGACGCTCTTATTGTAGCTATCGAGACCCAAG<br>ACCAATAACTCAGCAACAAGAAGACGTGAACACGCAAAGTTGTCATATGGACCG<br>ACGGCGAGAG  |
| ssODN #19 lcc3 stop  | AGGGCGACCGCTTCCAGCTTAATGTTGTCGACTAGTTGACCAACCACACTATGTTG<br>TAGACCACTAGTATCGAATTCCTATGCTCCGCCTACTACCTCATATGTTGTGCTA<br>ACAACAGT   |
| ssODN #17 mnp2 stop  | GCCCCGAGCCGCCAGACGGTGTGCTCGGACGGCACCGTCGTCCCCGACTCGGTGT<br>GATGCGAATTCGTGCCCGTGAGTCGCGGTTGCGCTGCGCTTACCCCCGACGCCGA<br>GCACTCACGT  |

**Table S5.** Primers used for verification of edited loci.

| Primer name | Sequence (5' → 3')   | Amplicon size (bp) |
|-------------|----------------------|--------------------|
| ura3_seq_Fw | GACATGGTCGGGAGCTAGAG | 1261               |
| ura3_seq_Rv | AAGCGAAGGAGGAGGAAGAG |                    |
| sdi1_seq_Fw | AACATCAACGGCCAGAACAC | 989                |
| sdi1_seq_Rv | ATCCCGTCAGGCAGTACAAG |                    |
| ku80_seq_Fw | CATCGCCTCTTGCTGACTC  | 1002               |
| ku80_seq_Rv | TAGTGTGAGTGCGGTGTTGC |                    |
| lcc3_seq_Fw | CCTTTGGTCTTCGAGCAGTC | 990                |
| lcc3_seq_Rv | TACCGCTTGCCCTGAGTAAC |                    |
| mnp2_seq_Fw | CACATCCTTGTGAACGCAAC | 957                |
| mnp2_seq_Rv | TCTGAAAGGAGCAGGGAGTG |                    |
